# Supplementary material
Source: publisher site journal article supplement (https://www.spandidos-publications.com/8445/downloadSupplementary)

## Data S1

**Bone marrow aspirate assessment.** Bone marrow aspirate smears were air-dried, fixed in absolute methanol for 10 min at 22°C, and stained with Wright's stain for 10 min at room temperature. Stained smears were examined using an Olympus BX51 light microscope (Olympus Corporation).

**Histological and staining methods.** Bone marrow biopsy specimens were processed as follows: Tissues were fixed in 10% neutral buffered formalin at room temperature for 24-48 h. Fixed tissues were embedded in paraffin and sectioned at a thickness of 4  $\mu$ m. All staining procedures were performed at room temperature.

**Reticulin silver staining.** Sections were treated sequentially with potassium permanganate (6-8 min), oxalic acid (1 min), ferric ammonium sulfate (6-8 min), ammoniacal silver solution (15-20 min), formalin (1 min), gold chloride (2 min) and sodium thiosulfate (1 min).

**Periodic acid-Schiff staining.** Sections were treated sequentially with periodic acid (20 min), Schiff reagent (30-40 min) and sodium metabisulfite (1 min), rinsed under running water and then counterstained with hematoxylin (1-2 min).

**Masson's trichrome staining.** Sections were treated sequentially with hematoxylin (1-2 min), Masson's composite staining solution (3-5 min), phosphomolybdic acid (1-3 min) and aniline blue (5-6 min), and differentiated with acetic acid (1 min).

**Hematoxylin and eosin staining.** Sections were baked, deparaffinized in xylene and then stained with hematoxylin (5-8 min). The sections were rinsed, blued (1 min), rinsed again, stained with eosin (1-2 min), rinsed, dehydrated through a graded alcohol series, cleared in xylene and mounted.

**Microscopy.** Stained sections were examined using a light microscope.

**Flow cytometry.** The sample type was a bone marrow aspirate. Red blood cells were lysed using a commercial ammonium chloride-based lysing solution. A single-cell suspension was prepared and washed prior to antibody staining. The sample was processed within 24 h of collection.

The immunophenotyping panel was designed for comprehensive lineage assessment and minimal residual disease detection in hematopoietic malignancies. The conjugated antibodies used were as follows: CD38 (FITC; catalog no. 340909, BD Biosciences), CD5 (PE; catalog no. 665749; BD Biosciences), CD45 (PerCP; catalog no. 8931017; Agilent Technologies, Inc.), CD10 (PerCP; catalog no. 8930045; Agilent Technologies, Inc.), CD11b (FITC; catalog no. IM0530; Beckman Coulter, Inc.). Flow cytometry was performed using the BD FACSCanto II (BD Biosciences) with NovoExpress software (version 1.4.1; Agilent Technologies, Inc.). Cells

processed without fluorochrome-conjugated antibodies were used as an unstained control to assess autofluorescence.

**Next-generation sequencing.** Sequencing was performed by Hangzhou Chain Medical Laboratory Co., Ltd. using the QIAamp DNA Mini Kit (catalog no. 51304; Qiagen, Inc.) for bone marrow DNA isolation.

**Quality verification.** Purity and concentration were assessed using a NanoDrop 2000 spectrophotometer (Thermo Fisher Scientific, Inc.). Integrity was evaluated using an Agilent 2100 Bioanalyzer with High Sensitivity DNA Kit (cat. no. 5067-4626; Agilent Technologies, Inc.). The sample requirement was a minimum DNA input of 50 ng with an A260/280 ratio >1.8 and DNA integrity number >7.0.

**Library preparation and sequencing.** Target enrichment was performed using a custom-designed panel for hematological malignancy genes (for example, covering genes relevant to MDS and AML). The library construction kit was the xGen Pan-Cancer Panel v2 (catalog no. 1056116; Integrated DNA Technologies, Inc.) or equivalent.

Genomic DNA was fragmented to a target size of 250-300 bp using a Covaris S220 system (Covaris, Inc.). Adapter ligation was performed using xGen UDI-UMI Adapters (catalog no. 10005910; Integrated DNA Technologies, Inc.), followed by 8 cycles of PCR amplification with KAPA HiFi HotStart ReadyMix (catalog no. 7958935001; Roche). Library concentration was quantified by quantitative PCR using the KAPA Library Quantification Kit for Illumina platforms (catalog no. 07960140001; Roche Diagnostics GmbH) on an Applied Biosystems QuantStudio 5 Real-Time PCR System (Thermo Fisher Scientific, Inc.). The final library was loaded at a concentration of 300 pM.

Sequencing was performed on the Illumina NovaSeq 6000 system (Illumina, Inc.) using the NovaSeq 6000 S4 Reagent Kit (300 cycles; catalog no. 20028316; Illumina, Inc.) with 2x150 bp paired-end reads. A sequencing quality threshold of >93% of bases achieving Q30 was applied, consistent with published standards.

**Bioinformatics analysis.** Base calling and demultiplexing were performed using the Illumina DRAGEN Bio-IT Platform (Illumina, Inc.). Reads were aligned to the human reference genome (GRCh37/hg19) using the Burrows-Wheeler Aligner. Variant calling for single nucleotide variants and small insertions/deletions was conducted following the GATK Best Practices pipeline. Annotation was performed using ANNOVAR (<https://annovar.openbioinformatics.org/en/latest/>), with reference to public databases including dbSNP (<https://www.ncbi.nlm.nih.gov/snp/>), ClinVar, (<https://www.ncbi.nlm.nih.gov/clinvar/>) and COSMIC (<https://cancer.sanger.ac.uk/cosmic/login>).

**Data quality metrics.** The following data quality metrics were achieved: Average sequencing depth >500x for targeted regions; >95% of target bases covered at  $\geq$ 100x; and variant detection sensitivity of  $\sim$ 5% allele frequency at 500x depth.

Figure S1.

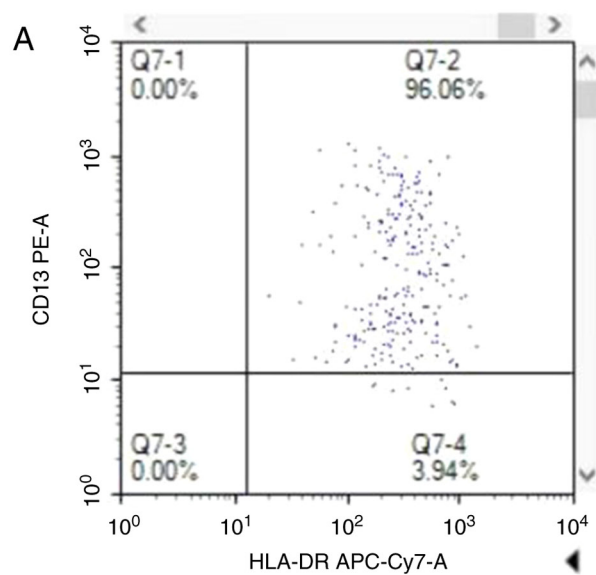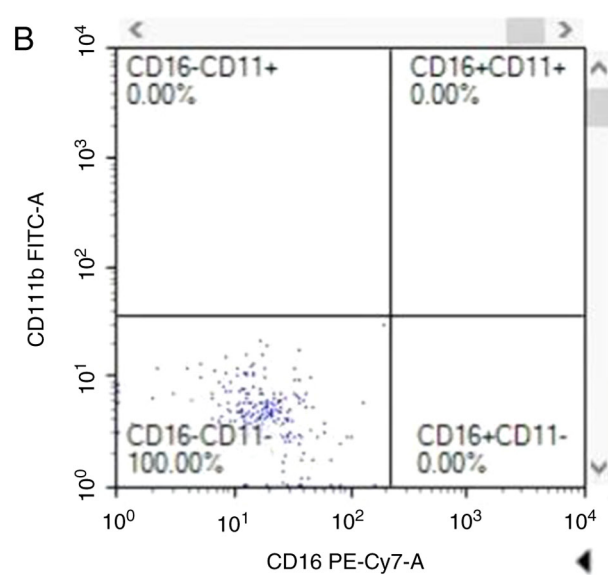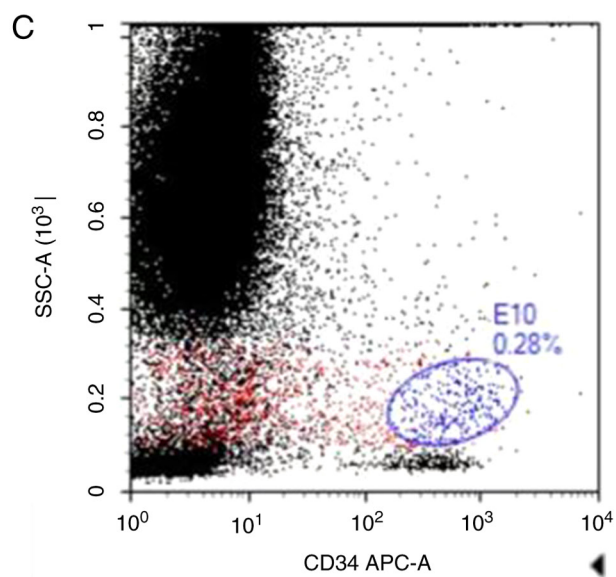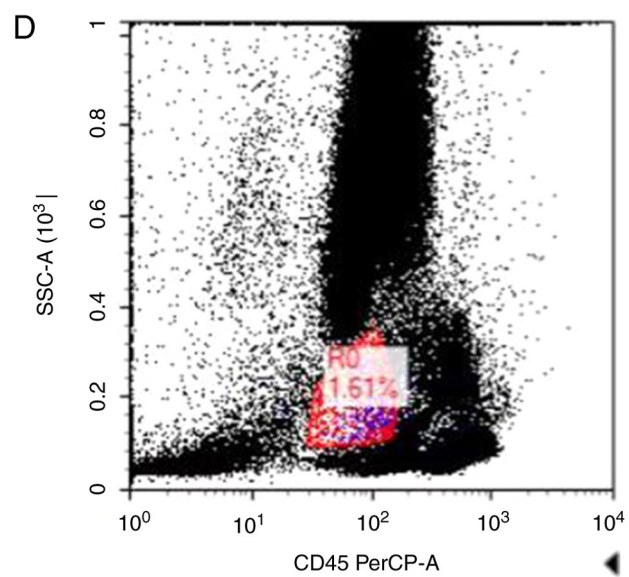

Supplement: Supplementary file 1 [file downloadSupplementary]
